# Supplementary material for: Designing fault-tolerant SOA based on design diversity
Source: Springer Nature journal article supplement (doi:10.1186/s40411-014-0013-7), 2014-11-13
Supplement: 40411_2014_13_MOESM1_ESM.pdf [file 40411_2014_13_MOESM1_ESM.pdf]

**Additional file 1: Supplementary Table.**

**Table S1 Classification of the Primary Studies**

| PRIMARY STUDIES                                                    | Gotze et al. (2008) | Buys et al. (2011) | Nourani (2011); Nourani and Azgomi (2009) | Townend et al. (2005); Xu (2011) | Nascimento et al. (2012a,b) | Dillen et al. (2012) | Nascimento et al. (2011) | Abdeldjelil et al. (2012); Faci et al. (2011) | Santos et al. (2005) | Looker et al. (2005) | Kotonya and Hall (2010) | Gorbenko et al. (2005; 2012) | Zheng and Lyu (2008; 2010a; 2010b) | Goncalves and Rubira (2010) | Chen and Romanovsky (2008) | Mansour and Dillon (2011) | Laranjeiro and Vieira (2007) |  |
|--------------------------------------------------------------------|---------------------|--------------------|-------------------------------------------|----------------------------------|-----------------------------|----------------------|--------------------------|-----------------------------------------------|----------------------|----------------------|-------------------------|------------------------------|------------------------------------|-----------------------------|----------------------------|---------------------------|------------------------------|--|
| <b>Design issues and solutions FOR FT</b>                          |                     |                    |                                           |                                  |                             |                      |                          |                                               |                      |                      |                         |                              |                                    |                             |                            |                           |                              |  |
| Selection of variant services                                      | Y                   | Y                  | N                                         | Y                                | Y                           | Y                    | Y                        | Y                                             | N                    | N                    | Y                       | Y                            | Y                                  | N                           | Y                          | Y                         | N                            |  |
| Execution of variant services                                      | U                   | Y                  | Y                                         | U                                | N                           | Y                    | Y                        | Y                                             | Y                    | Y                    | Y                       | Y                            | Y                                  | Y                           | Y                          | Y                         | Y                            |  |
| Sequentially                                                       | -                   | Y                  | Y                                         | -                                | -                           | Y                    | Y                        | Y                                             | N                    | N                    | N                       | Y                            | Y                                  | Y                           | Y                          | Y                         | Y                            |  |
| Parallely                                                          | -                   | Y                  | Y                                         | -                                | -                           | Y                    | Y                        | Y                                             | Y                    | Y                    | Y                       | Y                            | Y                                  | Y                           | Y                          | Y                         | Y                            |  |
| Judgement on result acceptability                                  | Y                   | Y                  | Y                                         | Y                                | N                           | Y                    | Y                        | Y                                             | Y                    | Y                    | Y                       | U                            | Y                                  | N                           | N                          | Y                         | Y                            |  |
| <b>Voter</b>                                                       | Y                   | Y                  | Y                                         | Y                                | -                           | Y                    | Y                        | Y                                             | Y                    | N                    | U                       | -                            | Y                                  | -                           | -                          | U                         | Y                            |  |
| Median Voter                                                       | N                   | N                  | N                                         | N                                | -                           | N                    | N                        | N                                             | N                    | N                    | -                       | -                            | N                                  | -                           | -                          | -                         | N                            |  |
| Mean Voter                                                         | N                   | N                  | N                                         | N                                | -                           | N                    | N                        | N                                             | N                    | N                    | -                       | -                            | N                                  | -                           | -                          | -                         | N                            |  |
| Majority Voter                                                     | N                   | N                  | Y                                         | N                                | -                           | N                    | Y                        | N                                             | N                    | Y                    | -                       | -                            | Y                                  | -                           | -                          | -                         | N                            |  |
| Consensus Voter                                                    | N                   | N                  | Y                                         | N                                | -                           | N                    | N                        | N                                             | Y                    | N                    | -                       | -                            | N                                  | -                           | -                          | -                         | Y                            |  |
| Formal Voter                                                       | N                   | N                  | N                                         | N                                | -                           | Y                    | N                        | Y                                             | N                    | N                    | -                       | -                            | N                                  | -                           | -                          | -                         | N                            |  |
| Dynamic Voter                                                      | Y                   | Y                  | Y                                         | Y                                | -                           | N                    | N                        | N                                             | N                    | N                    | -                       | -                            | N                                  | -                           | -                          | -                         | N                            |  |
| <b>Acceptance tests</b>                                            | N                   | N                  | U                                         | N                                | -                           | Y                    | U                        | N                                             | N                    | N                    | N                       | -                            | N                                  | -                           | -                          | U                         | N                            |  |
| Satisf. Requir.                                                    | -                   | -                  | -                                         | -                                | -                           | Y                    | -                        | -                                             | -                    | -                    | -                       | -                            | -                                  | -                           | -                          | -                         | -                            |  |
| Account. Tests                                                     | -                   | -                  | -                                         | -                                | -                           | N                    | -                        | -                                             | -                    | -                    | -                       | -                            | -                                  | -                           | -                          | -                         | -                            |  |
| Comp. Runtime Tests                                                | -                   | -                  | -                                         | -                                | -                           | N                    | -                        | -                                             | -                    | -                    | -                       | -                            | -                                  | -                           | -                          | -                         | -                            |  |
| Reasonableness Tests                                               | -                   | -                  | -                                         | -                                | -                           | N                    | -                        | -                                             | -                    | -                    | -                       | -                            | -                                  | -                           | -                          | -                         | -                            |  |
| <b>Hybrid adjudicator</b>                                          | N                   | N                  | Y                                         | N                                | -                           | N                    | N                        | N                                             | N                    | N                    | N                       | -                            | N                                  | -                           | -                          | N                         | N                            |  |
| <b>DESIGN issues for SOA-related quality requirements (SOA-QR)</b> |                     |                    |                                           |                                  |                             |                      |                          |                                               |                      |                      |                         |                              |                                    |                             |                            |                           |                              |  |
| QR - Interoperability Capabilities                                 | N                   | Y                  | Y                                         | Y                                | -                           | Y                    | Y                        | N                                             | Y                    | N                    | Y                       | N                            | Y                                  | Y                           | N                          | N                         | Y                            |  |
| QR - Autonomic Composition of Services                             | N                   | Y                  | N                                         | Y                                | -                           | Y                    | Y                        | N                                             | Y                    | N                    | Y                       | N                            | Y                                  | N                           | Y                          | Y                         | Y                            |  |
| QR - QoS-aware Service Compositions                                | N                   | Y                  | N                                         | Y                                | -                           | Y                    | Y                        | N                                             | Y                    | N                    | Y                       | N                            | Y                                  | N                           | Y                          | Y                         | Y                            |  |
| QR - Business-Driven Automated Computing                           | N                   | Y                  | N                                         | Y                                | -                           | Y                    | Y                        | N                                             | Y                    | N                    | Y                       | N                            | Y                                  | N                           | Y                          | N                         | Y                            |  |
